# Supplementary material for: BPIFB4 Circulating Levels and Its Prognostic Relevance in COVID-19
Source: PubMed Central journal article supplement (PMC8436991; doi:10.1093/gerona/glab208), 2021-08-16
Supplement: glab208_suppl_supplementary_material.pdf [file glab208_suppl_supplementary_material.pdf]

## BEAS-2B

| Name                               | Dilution | MCP-1 | IL-6   | TNF- $\alpha$ | IL-1 $\beta$ | IL-8    | IL-10 | IL-1beta | INF-alpha2 | IFN-gamma | IL-12p70 | IL-17a | IL-18 | IL-23 | IL-33 |
|------------------------------------|----------|-------|--------|---------------|--------------|---------|-------|----------|------------|-----------|----------|--------|-------|-------|-------|
|                                    |          | pg/ml | pg/ml  | pg/ml         | pg/ml        | pg/ml   | pg/ml | pg/ml    | pg/ml      | pg/ml     | pg/ml    | pg/ml  | pg/ml | pg/ml | pg/ml |
| BEAS-2B alone                      | 1        | 30.00 | 28.74  | 2.91          | <2.27        | 557.64  | <2.24 | <2.27    | <2.28      | <2.29     | <2.30    | <2.31  | <2.32 | <2.33 | <2.34 |
| BEAS-2B SARS-CoV2Lysate            | 1        | 34.67 | 291.06 | <2.38         | <2.27        | 2708.59 | <2.24 | <2.27    | <2.28      | <2.29     | <2.30    | <2.31  | <2.32 | <2.33 | <2.34 |
| BEAS-2B SARS-CoV2Lysate+LAV-BPIFB4 | 1        | 35.66 | 280.43 | <2.38         | <2.27        | 3129.39 | <2.24 | <2.27    | <2.28      | <2.29     | <2.30    | <2.31  | <2.32 | <2.33 | <2.34 |

## HUVEC

| Name                              | Dilution | MCP-1   | IL-6    | TNF- $\alpha$ | IL-1 $\beta$ | IL-8      | IL-10 | IL-1beta | INF-alpha2 | IFN-gamma | IL-12p70 | IL-17a | IL-18 | IL-23 | IL-33 |
|-----------------------------------|----------|---------|---------|---------------|--------------|-----------|-------|----------|------------|-----------|----------|--------|-------|-------|-------|
|                                   |          | pg/ml   | pg/ml   | pg/ml         | pg/ml        | pg/ml     | pg/ml | pg/ml    | pg/ml      | pg/ml     | pg/ml    | pg/ml  | pg/ml | pg/ml | pg/ml |
| HUVEC alone                       | 1        | 1419.89 | 2630.49 | 25.45         | 2.71         | >12350.74 | 14.95 | <2.27    | <2.28      | <2.29     | <2.30    | <2.31  | <2.32 | <2.33 | <2.34 |
| HUVEC SARS-CoV2Lysate             | 1        | 1338.54 | 2548.20 | 5.92          | 2.71         | >12350.74 | 14.95 | <2.27    | <2.28      | <2.29     | <2.30    | <2.31  | <2.32 | <2.33 | <2.34 |
| HUVEC SARS-CoV2Lysate +LAV-BPIFB4 | 1        | 875.12  | 1519.82 | 25.45         | 2.71         | >12350.74 | 14.95 | <2.27    | <2.28      | <2.29     | <2.30    | <2.31  | <2.32 | <2.33 | <2.34 |

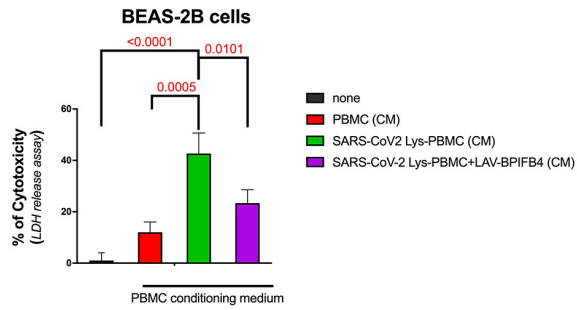

Supplementary Figure 1

**Supplementary Table 1**

| <b>Laboratory Analysis</b>                                       | <b>Mean ± SD; Median</b> |
|------------------------------------------------------------------|--------------------------|
| <b>CPR</b> (mg/dl; normal range 0-4,5)                           | 5,81 ± 8,76; 2,1         |
| <b>D-Dimer</b> (ng/ml; normal range <500)                        | 951,19 ± 1715,30; 440    |
| <b>Erythrocyte Sedimentation Rate (mm/hr, normal range 0-22)</b> | 41,06 ± 24,59; 35        |
| <b>Ferritin</b> (ug/L; normal range 15-200)                      | 467,10 ± 464,80; 388,6   |
| <b>Fibrinogen</b> (mg/dl; normal range 150-400)                  | 431,27 ± 217,42; 408,5   |
| <b>Hematocrit</b> (%; normal range 35-48 %)                      | 37,62 ± 5,57; 37,7       |
| <b>Hemoglobin</b> (d/dl; normal range 12-15 g/dl)                | 12,21 ± 2,02; 12         |
| <b>LDH</b> (U/L; normal range 0-252)                             | 415,94 ± 287,54; 338     |
| <b>Leucocytes</b> (10 <sup>3</sup> /μL; normal range 4,5-11)     | 8,06 ± 4,09; 6,6         |
| <b>Lymphocytes</b> (10 <sup>3</sup> /μL; normal range 1,0-4,8)   | 1,53 ± 0,80; 1,51        |
| <b>Mean Corpuscular Volume</b> (fL; normal range 80-96 fL)       | 89,08 ± 7,76; 89         |
| <b>Platelet</b> (10 <sup>3</sup> /μL, normal range 150-450)      | 227,76 ± 104,98; 214,5   |
